# Supplementary material for: Semen Modulates Cell Proliferation and Differentiation-Related Transcripts in the Pig Peri-Ovulatory Endometrium
Source: MDPI journal article supplement (doi:10.3390/biology11040616), 2022-04-18
Supplement: s1 [file s1]

---

*Article*

# Semen Modulates Cell Proliferation and Differentiation-Related Transcripts in the Pig Peri-Ovulatory Endometrium

Jaume Gardela <sup>1,2,†</sup>, Mateo Ruiz-Conca <sup>1,2,‡</sup>, Dominic Wright <sup>3</sup>, Manel López-Béjar <sup>2,4</sup>, Cristina A. Martínez <sup>1</sup>, Heriberto Rodríguez-Martínez <sup>1,\*</sup> and Manuel Álvarez-Rodríguez <sup>1,2,‡</sup>

<sup>1</sup> Department of Biomedical & Clinical Sciences (BKV), BKH/Obstetrics & Gynecology, Faculty of Medicine and Health Sciences, Linköping University, SE-58185 Linköping, Sweden; jaume.gardela@uab.cat (J.G.); mateo.ruiz@uab.cat (M.R.-C.); cristina.martinez-serrano@liu.se (C.A.M.); manualvro@gmail.com (M.Á.-R.)

<sup>2</sup> Department of Animal Health and Anatomy, Veterinary Faculty, Universitat Autònoma de Barcelona, 08193 Bellaterra, Spain; manel.lopez.bejar@uab.cat (M.L.-B.)

<sup>3</sup> Department of Physics, Chemistry and Biology, Faculty of Science and Engineering, Linköping University, 58185 Linköping, Sweden; dominic.wright@liu.se

<sup>4</sup> College of Veterinary Medicine, Western University of Health Sciences, Pomona, CA 91766, USA

\* Correspondence: heriberto.rodriguez-martinez@liu.se

† These authors contributed equally to this work.

‡ These authors contributed equally to this work.

**Table S1.** Fold change of the differential mRNA expression ( $p < 0.05$ , red: False Discovery Rate,  $q < 0.05$ ) in the different segments of the sow reproductive tract (cervix to infundibulum), 24 h post-treatment.

| Gene Symbol | Natural Mating |                   | Semen-AI   |      | SP-AI |                | SP-TOTAL |             |
|-------------|----------------|-------------------|------------|------|-------|----------------|----------|-------------|
|             | UP             | DOWN              | UP         | DOWN | UP    | DOWN           | UP       | DOWN        |
| ACKR1       | -              | Isth (-1.78)      | Cvx (1.61) | -    | -     | -              | -        | -           |
| ACKR2       | Amp (1.19),    | Cvx (-1.44)       | -          | -    | -     | -              | -        | -           |
|             | Inf (1.26)     |                   |            |      |       |                |          |             |
| ACKR3       |                | Cvx (-1.9),       |            |      |       |                |          |             |
|             |                | DistUt (-3.21),   |            |      |       |                |          |             |
|             | -              | ProxUt (-2.59),   | -          | -    | -     | DistUt (-1.37) | -        | Cvx (-1.76) |
|             |                | UTJ (-2.33), Isth |            |      |       |                |          |             |
|             |                | (-2.45)           |            |      |       |                |          |             |

|              |                           |             |                            |              |            |                |               |                |
|--------------|---------------------------|-------------|----------------------------|--------------|------------|----------------|---------------|----------------|
| <i>ACKR4</i> | UTJ (1.23),<br>Inf (1.57) | -           | ProxUt (1.39)              | -            | -          | -              | Inf (1.17)    | Cvx (-1.29)    |
| <i>CCL1</i>  | -                         | -           | -                          | -            | -          | -              | -             | -              |
| <i>CCL11</i> | Isth (1.39)               | -           | UTJ (1.22), Isth<br>(1.25) | -            | -          | ProxUt (-1.13) | -             | ProxUt (-1.23) |
| <i>CCL14</i> | DistUt (1.76)             | -           | Cvx (1.27)                 | -            | -          | -              | -             | -              |
| <i>CCL16</i> | -                         | -           | UTJ (1.21)                 | Isth (-1.14) | -          | -              | DistUt (1.15) | -              |
| <i>CCL19</i> | Inf (1.26)                | -           | -                          | -            | Inf (1.25) | -              | Amp (1.18)    | -              |
| <i>CCL2</i>  | -                         | Cvx (-5.23) | -                          | -            | -          | -              | -             | -              |
| <i>CCL20</i> | -                         | Cvx (-6.81) | Inf (1.18)                 | -            | Inf (1.18) | -              | -             | -              |

|        |                        |             |            |             |            |             |   |   |
|--------|------------------------|-------------|------------|-------------|------------|-------------|---|---|
| CCL21  | -                      | -           | -          | -           | -          | -           | - | - |
| CCL22  | Amp (1.3)              | -           | -          | -           | -          | -           | - | - |
| CCL23  | -                      | -           | Amp (1.36) | -           | Amp (1.43) | -           | - | - |
| CCL25  | -                      | -           | -          | -           | -          | Inf (-1.08) | - | - |
| CCL27  | ProxUt (1.26)          | Isth (-1.2) | -          | -           | -          | -           | - | - |
| CCL28  | Cvx (2.3),             |             |            |             |            |             |   |   |
|        | Inf (3.72)             |             |            |             |            |             |   |   |
|        | UTJ (2.72), Amp (2.89) | -           | -          | UTJ (-2.08) | -          | -           | - | - |
| CCL3L1 | -                      | -           | -          | -           | -          | -           | - | - |

|                   |                              |             |                              |             |   |   |   |             |
|-------------------|------------------------------|-------------|------------------------------|-------------|---|---|---|-------------|
| <i>CCL4</i>       | Inf (1.37)                   | -           | -                            | -           | - | - | - | -           |
| <i>CCL5</i>       | Inf (1.13)                   | -           | -                            | UTJ (-1.48) | - | - | - | -           |
| <i>CCR1; XCR1</i> | -                            | Cvx (-3.06) | -                            | -           | - | - | - | -           |
| <i>CCR10</i>      | ProxUt (1.21),<br>Inf (1.21) | -           | -                            | -           | - | - | - | -           |
| <i>CCR7</i>       | ProxUt (1.23)                | -           | -                            | -           | - | - | - | -           |
| <i>CCR9</i>       | -                            | Cvx (-1.3)  | -                            | -           | - | - | - | Cvx (-1.25) |
| <i>CMKLR1</i>     | -                            | -           | Cvx (1.61),<br>ProxUt (1.35) | -           | - | - | - | -           |

|                      |                           |                                                |   |                                              |   |                              |            |   |
|----------------------|---------------------------|------------------------------------------------|---|----------------------------------------------|---|------------------------------|------------|---|
| <b><i>CXCL10</i></b> | -                         | Cvx (-4.69),<br>Amp (-3.69)                    | - | Amp (-3.22)                                  | - | Amp (-1.9)                   | UTJ (2.19) | - |
| <b><i>CXCL11</i></b> | -                         | Cvx (-3.45),<br>ProxUt (-4.44),<br>Amp (-2.45) | - | Amp (-2.37)                                  | - | -                            | -          | - |
| <b><i>CXCL12</i></b> | -                         | -                                              | - | -                                            | - | -                            | -          | - |
| <b><i>CXCL14</i></b> | Amp (2.62),<br>Inf (1.77) | -                                              | - | Cvx (-2.19), UTJ<br>(-5.56),<br>Isth (-4.07) | - | UTJ (-3.31), Isth<br>(-5.82) | -          | - |
| <b><i>CXCL16</i></b> | -                         | -                                              | - | UTJ (-2.13)                                  | - | -                            | -          | - |
| <b><i>CXCL2</i></b>  | -                         | Cvx (-3.96)                                    | - | UTJ (-6.12)                                  | - | -                            | -          | - |

|                     |                |                |               |             |   |          |         |   |   |
|---------------------|----------------|----------------|---------------|-------------|---|----------|---------|---|---|
| <i>CXCL8;</i>       |                | Cvx (-4.38),   |               |             |   |          |         |   |   |
|                     | -              |                | -             | UTJ (-5.78) | - | -        | -       | - | - |
| <i>LOC100620730</i> |                | ProxUt (-3.06) |               |             |   |          |         |   |   |
| <i>CXCL9</i>        | UTJ (1.43)     | -              | ProxUt (2.21) | -           | - | -        | UTJ (2) | - | - |
| <i>CXCR1</i>        | -              | -              | -             | -           | - | Cvx (-2) | -       | - | - |
| <i>CXCR2</i>        | -              | -              | -             | -           | - | -        | -       | - | - |
| <i>CXCR3</i>        | Inf (1.21)     | -              | Cvx (1.37)    | -           | - | -        | -       | - | - |
|                     | DistUt (1.68), |                |               |             |   |          |         |   |   |
|                     | UTJ (1.75),    |                |               |             |   |          |         |   |   |
| <i>CXCR4</i>        |                | -              | -             | -           | - | -        | -       | - | - |
|                     | Isth (5.1),    |                |               |             |   |          |         |   |   |
|                     | Amp (1.29),    |                |               |             |   |          |         |   |   |

|                | Inf (2.22)  |                                 |             |                                |             |                |             |                          |
|----------------|-------------|---------------------------------|-------------|--------------------------------|-------------|----------------|-------------|--------------------------|
| <i>CXCR5</i>   | Amp (1.27), | -                               | -           | -                              | -           | -              | -           | -                        |
|                | Inf (1.21)  |                                 |             |                                |             |                |             |                          |
| <i>CXCR6</i>   | -           | -                               | -           | -                              | -           | -              | -           | -                        |
|                |             |                                 |             |                                |             |                |             |                          |
| <i>FAM19A1</i> | -           | -                               | Amp (1.31), | -                              | -           | ProxUt (-1.26) | -           | -                        |
|                |             |                                 | Inf (1.38)  |                                |             |                |             |                          |
|                |             |                                 |             |                                |             |                |             |                          |
| <i>FAM19A3</i> | -           | UTJ (-1.33)                     | -           | -                              | Isth (1.23) | -              | Isth (1.15) | UTJ (-1.46), Amp (-1.36) |
|                |             |                                 |             |                                |             |                |             |                          |
|                |             |                                 |             |                                |             |                |             |                          |
| <i>FAM19A4</i> | -           | Cvx (-3.35),<br>DistUt (-1.97), | -           | Cvx (-2.13),<br>ProxUt (-2.04) | -           | ProxUt (-1.67) | Inf (1.3)   | -                        |
|                |             | ProxUt (-2.36),                 |             |                                |             |                |             |                          |





|              |               |                                                   |   |               |   |                |   |                                |
|--------------|---------------|---------------------------------------------------|---|---------------|---|----------------|---|--------------------------------|
| <i>FGF17</i> | ProxUt (1.17) | DistUt (-1.12)                                    | - | DistUt (-1.1) | - | Isth (-1.35)   | - | -                              |
| <i>FGF18</i> | Inf (1.55)    | -                                                 | - | -             | - | -              | - | -                              |
| <i>FGF19</i> | -             | Amp (-1.16)                                       | - | -             | - | -              | - | -                              |
| <i>FGF2</i>  | -             | Cvx (-2.89),<br>DistUt (-3.57),<br>ProxUt (-2.62) | - | -             | - | DistUt (-1.54) | - | Cvx (-1.94),<br>DistUt (-1.24) |
| <i>FGF20</i> | -             | DistUt (-1.29)                                    | - | -             | - | -              | - | -                              |
| <i>FGF21</i> | ProxUt (1.32) | -                                                 | - | -             | - | -              | - | -                              |
| <i>FGF23</i> | -             | -                                                 | - | -             | - | -              | - | -                              |
| <i>FGF4</i>  | -             | -                                                 | - | -             | - | -              | - | -                              |

|               |   |                                                                                                                  |               |                |   |                                 |            |              |
|---------------|---|------------------------------------------------------------------------------------------------------------------|---------------|----------------|---|---------------------------------|------------|--------------|
| <i>FGF5</i>   | - | -                                                                                                                | ProxUt (1.12) | -              | - | -                               | -          | -            |
| <i>FGF6</i>   | - | -                                                                                                                | -             | -              | - | -                               | -          | -            |
| <i>FGF9</i>   | - | DistUt (-1.43)                                                                                                   | -             | DistUt (-1.44) | - | DistUt (-1.33),<br>Isth (-1.33) | -          | Isth (-1.35) |
| <i>FGFBP1</i> | - | Cvx (-9.15),<br>DistUt (-3.37),<br>ProxUt (-3.97),<br>UTJ (-7.86), Isth<br>(-5.99), Amp (-<br>5.22), Inf (-3.99) | -             | -              | - | -                               | Amp (1.76) | -            |

|                         |             |                  |               |                 |   |              |            |                 |
|-------------------------|-------------|------------------|---------------|-----------------|---|--------------|------------|-----------------|
|                         |             | DistUt (-2.37),  |               | DistUt (-1.38), |   |              |            | DistUt (-1.22), |
| <b><i>FGFR1</i></b>     | -           | ProxUt (-2.22),  | -             | ProxUt (-1.58)  | - | -            | -          | ProxUt (-1.41)  |
|                         |             | UTJ (-1.28)      |               |                 |   |              |            |                 |
| <b><i>FGFR1OP</i></b>   | -           | Amp (-1.19), Inf | -             | -               | - | Isth (-1.18) | Cvx (1.23) | -               |
|                         |             | (-1.33)          |               |                 |   |              |            |                 |
| <b><i>FGFR1OP2</i></b>  | -           | ProxUt (-1.29)   | -             | -               | - | -            | -          | -               |
|                         |             | Cvx (2.02),      |               |                 |   |              |            |                 |
| <b><i>FGFR2</i></b>     | UTJ (1.28), | -                | ProxUt (1.46) | -               | - | -            | -          | -               |
|                         | Isth (1.19) |                  |               |                 |   |              |            |                 |
| <b><i>FGFR2IIIC</i></b> | UTJ (1.57), | -                | UTJ (1.7)     | -               | - | -            | -          | -               |

|                                                              |                                                                             |                                                   |                                                         |                               |            |                |   |   |   |
|--------------------------------------------------------------|-----------------------------------------------------------------------------|---------------------------------------------------|---------------------------------------------------------|-------------------------------|------------|----------------|---|---|---|
|                                                              | Isth (1.85)                                                                 |                                                   |                                                         |                               |            |                |   |   |   |
| <i>FGFR4</i>                                                 | UTJ (1.28), Amp<br>(1.2)                                                    | -                                                 | -                                                       | -                             | -          | -              | - | - | - |
| <i>IGF1</i>                                                  | -                                                                           | DistUt (-2.99),<br>ProxUt (-4.19),<br>Inf (-4.67) | -                                                       | ProxUt (-4.8), Inf<br>(-1.88) | -          | ProxUt (-1.86) | - | - | - |
| <i>IGF1R;</i><br><i>LOC100623509;</i><br><i>LOC100622436</i> | Cvx (1.93),<br>ProxUt (1.56),<br>UTJ (1.49),<br>Isth (1.65), Amp<br>(1.77), | -                                                 | UTJ (1.36),<br>Isth (1.3),<br>Amp (1.12),<br>Inf (1.41) | -                             | Isth (1.2) | -              | - | - | - |

|                                   |            |                                   |            |             |   |                |   |                                |
|-----------------------------------|------------|-----------------------------------|------------|-------------|---|----------------|---|--------------------------------|
|                                   | Inf (1.73) |                                   |            |             |   |                |   |                                |
| <b><i>IGF2BP2</i></b>             | -          | -                                 | Inf (1.44) | UTJ (-1.65) | - | -              | - | -                              |
| <b><i>IGF2R; LOC100739014</i></b> | Inf (1.15) | -                                 | -          | -           | - | -              | - | -                              |
| <b><i>IGFALS</i></b>              | -          | -                                 | -          | -           | - | -              | - | -                              |
| <b><i>IGFBP1</i></b>              | -          | -                                 | -          | -           | - | -              | - | -                              |
| <b><i>IGFBP4</i></b>              | -          | Cvx (-1.4),<br>DistUt (-1.36)     | -          | -           | - | DistUt (-1.13) | - | Cvx (-1.47),<br>DistUt (-1.32) |
| <b><i>IGFBP7</i></b>              | -          | DistUt (-1.15),<br>ProxUt (-1.39) | -          | -           | - | -              | - | Cvx (-1.64)                    |
| <b><i>IL10</i></b>                | UTJ (1.45) | -                                 | -          | -           | - | -              | - | -                              |

|                     |                |                |                 |   |   |   |   |   |             |
|---------------------|----------------|----------------|-----------------|---|---|---|---|---|-------------|
| <i>IL10RA;</i>      | Amp (1.43),    |                | Cvx (1.43), UTJ |   |   |   |   |   |             |
|                     |                | -              |                 | - | - | - | - | - |             |
| <i>LOC100622546</i> | Inf (1.29)     |                | (1.28)          |   |   |   |   |   |             |
|                     |                |                |                 |   |   |   |   |   |             |
| <i>IL11RA</i>       | DistUt (1.2),  |                |                 |   |   |   |   |   |             |
|                     | ProxUt (1.27), | -              | -               | - | - | - | - | - |             |
|                     |                |                |                 |   |   |   |   |   |             |
| <i>IL12A</i>        | -              | DistUt (-1.22) | -               | - | - | - | - | - |             |
|                     |                |                |                 |   |   |   |   |   |             |
|                     | Amp (1.23),    |                |                 |   |   |   |   |   |             |
| <i>IL12RB1</i>      |                | -              | ProxUt (1.25)   | - | - | - | - | - |             |
|                     | Inf (1.1)      |                |                 |   |   |   |   |   |             |
|                     |                |                |                 |   |   |   |   |   |             |
| <i>IL12RB2</i>      | -              | -              | -               | - | - | - | - | - |             |
|                     |                |                |                 |   |   |   |   |   |             |
| <i>IL13</i>         | -              | -              | -               | - | - | - | - | - | Cvx (-1.37) |
|                     |                |                |                 |   |   |   |   |   |             |
| <i>IL13RA1</i>      | Amp (1.34),    | PorxUt (-1.28) | -               | - | - | - | - | - |             |

|                |                               |   |                           |   |            |               |                             |   |
|----------------|-------------------------------|---|---------------------------|---|------------|---------------|-----------------------------|---|
|                | Inf (1.4)                     |   |                           |   |            |               |                             |   |
| <i>IL13RA2</i> | -                             | - | -                         | - | Inf (1.37) | -             | -                           | - |
| <i>IL15</i>    | -                             | - | Cvx (1.35),<br>Inf (1.47) | - | Inf (1.23) | -             | Cvx (1.4),<br>DistUt (1.33) | - |
| <i>IL-15L</i>  | Amp (1.45)                    | - | Amp (1.22)                | - | Amp (1.19) | -             | -                           | - |
| <i>IL16</i>    | Inf (1.3)                     | - | -                         | - | -          | DistUt (-1.2) | -                           | - |
| <i>IL17A</i>   | -                             | - | -                         | - | -          | -             | Cvx (1.17)                  | - |
| <i>IL17B</i>   | -                             | - | UTJ (1.31)                | - | -          | -             | -                           | - |
| <i>IL17D</i>   | ProxUt (1.33),<br>UTJ (1.35), | - | -                         | - | -          | -             | -                           | - |



|        |                  |                  |            |                |           |   |   |             |
|--------|------------------|------------------|------------|----------------|-----------|---|---|-------------|
|        | Isth (1.94), Amp |                  |            |                |           |   |   |             |
|        | (1.33)           |                  |            |                |           |   |   |             |
|        | DistUt (1.19),   |                  |            |                |           |   |   |             |
|        | UTJ (2.14),      |                  |            |                |           |   |   |             |
| IL17RB | Isth (2.68),     | -                | Isth (1.6) | ProxUt (-1.26) | -         | - | - | -           |
|        | Amp (2.09),      |                  |            |                |           |   |   |             |
|        | Inf (1.6)        |                  |            |                |           |   |   |             |
| IL17RC | -                | -                | -          | -              | Cvx (1.6) | - | - | Inf (-1.24) |
|        |                  | UTJ (-1.36),     |            |                |           |   |   |             |
| IL17RD | -                | Amp (-1.18), Inf | -          | -              | -         | - | - | -           |
|        |                  | (-1.61)          |            |                |           |   |   |             |

|                                 |               |                |               |                |               |                |            |               |
|---------------------------------|---------------|----------------|---------------|----------------|---------------|----------------|------------|---------------|
| <i>IL17RE;<br/>LOC106505669</i> | Cvx (1.47),   |                |               |                |               |                |            |               |
|                                 | DistUt (1.4), | -              | ProxUt (1.38) | -              | Cvx (1.39),   | -              | Cvx (1.45) | -             |
|                                 | ProxUt (1.27) |                |               |                | ProxUt (1.19) |                |            |               |
| <i>IL17REL</i>                  | ProxUt (1.26) | -              | -             | -              | -             | -              | -          | -             |
| <i>IL18</i>                     |               | DistUt (-1.8), |               |                |               |                |            |               |
|                                 | -             | ProxUt (-1.85) | -             | -              | -             | Proxut (-1.49) | -          | -             |
| <i>IL18BP</i>                   | -             | -              | -             | -              | -             | -              | -          | Cvx (-1.26)   |
| <i>IL18R1</i>                   | -             | ProxUt (-2.18) | -             | ProxUt (-1.61) | -             | -              | -          | ProxUt (-1.5) |
| <i>IL18RAP</i>                  |               |                |               |                |               | Cvx (-1.57),   |            |               |
|                                 | Isth (1.22)   | Cvx (-1.92)    | -             | -              | -             | Distut (-1.52) | -          | -             |

|                            |               |                                                   |            |                |             |              |             |                |
|----------------------------|---------------|---------------------------------------------------|------------|----------------|-------------|--------------|-------------|----------------|
| <b><i>IL19</i></b>         | -             | Cvx (-1.29),<br>DistUt (-1.36)                    | -          | -              | Isth (1.35) | -            | Isth (1.36) | DistUt (-1.19) |
| <b><i>IL1A</i></b>         | -             | Cvx (-3.33),<br>DistUt (-1.87),<br>ProxUt (-1.58) | -          | -              | -           | -            | -           | -              |
| <b><i>IL1B1; IL1B2</i></b> | Inf (1.54)    | -                                                 | -          | -              | -           | -            | -           | -              |
| <b><i>IL1B2</i></b>        | -             | Cvx (-1.33)                                       | -          | -              | -           | Isth (-1.35) | -           | Amp (-1.73)    |
| <b><i>IL1RAPL1</i></b>     | -             | -                                                 | -          | -              | UTJ (1.36)  | -            | -           | -              |
| <b><i>IL1RAPL2</i></b>     | DistUt (1.28) | -                                                 | Inf (1.21) | -              | -           | -            | -           | -              |
| <b><i>IL1RL1</i></b>       | -             | ProxUt (-1.34)                                    | -          | ProxUt (-1.18) | -           | -            | -           | ProxUt (-1.15) |

|                                  |               |             |            |                |            |   |   |              |
|----------------------------------|---------------|-------------|------------|----------------|------------|---|---|--------------|
| <b><i>IL1RL2</i></b>             | -             | -           | -          | -              | -          | - | - | -            |
| <b><i>IL2</i></b>                | -             | -           | UTJ (1.32) | -              | -          | - | - | -            |
| <b><i>IL20</i></b>               | -             | -           | -          | ProxUt (-1.15) | -          | - | - | -            |
| <b><i>IL21</i></b>               | -             | -           | -          | Isth (-1.14)   | UTJ (1.29) | - | - | Isth (-1.18) |
| <b><i>IL21R</i></b>              | -             | -           | -          | -              | -          | - | - | -            |
| <b><i>IL24; LOC100621682</i></b> | -             | Inf (-1.45) | -          | DistUt (-1.1)  | -          | - | - | -            |
| <b><i>IL25</i></b>               | -             | -           | -          | -              | -          | - | - | -            |
| <b><i>IL26; LOC100620108</i></b> | -             | -           | -          | -              | UTJ (1.14) | - | - | -            |
| <b><i>IL27RA</i></b>             | -             | -           | Cvx (1.62) | -              | -          | - | - | -            |
| <b><i>IL28B</i></b>              | ProxUt (1.22) | -           | -          | -              | -          | - | - | -            |

|               |                |                |   |   |            |   |                           |   |
|---------------|----------------|----------------|---|---|------------|---|---------------------------|---|
| <i>IL2RG</i>  | Isth (1.42)    | -              | - | - | -          | - | -                         | - |
| <i>IL31</i>   | Amp (1.31)     | -              | - | - | UTJ (1.33) | - | -                         | - |
| <i>IL31RA</i> | DisUt (1.25),  |                |   |   |            |   |                           |   |
|               | ProxUt (1.37), |                |   |   |            |   |                           |   |
|               | UTJ (1.76),    | -              | - | - | -          | - | -                         | - |
| <i>IL33</i>   | Inf (1.23)     |                |   |   |            |   |                           |   |
|               | -              | ProxUt (-1.84) | - | - | Inf (1.74) | - | UTJ (2.11),<br>Amp (1.69) | - |
|               | DistUt (1.19), |                |   |   |            |   |                           |   |
| <i>IL34</i>   | ProxUt (1.22), | -              | - | - | -          | - | -                         | - |
|               | Amp (1.26),    |                |   |   |            |   |                           |   |

|                          |             |                |               |             |   |                |   |             |
|--------------------------|-------------|----------------|---------------|-------------|---|----------------|---|-------------|
|                          | Inf (1.68)  |                |               |             |   |                |   |             |
| <i>IL4</i>               | -           | -              | -             | -           | - | -              | - | -           |
| <i>IL4I1</i>             | -           | -              | -             | -           | - | UTJ (-1.33)    | - | -           |
|                          | Amp (1.1),  |                |               |             |   |                |   |             |
| <i>IL4R</i>              |             | -              | -             | -           | - | DistUt (-1.31) | - | -           |
|                          | Inf (1.08)  |                |               |             |   |                |   |             |
| <i>IL5</i>               | -           | Amp (-1.23)    | -             | Amp (-1.23) | - | -              | - | Amp (-1.19) |
| <i>IL5RA</i>             | Amp (1.29)  | -              | -             | -           | - | -              | - | -           |
| <i>IL-6; IL6</i>         | -           | Amp (-1.24)    | -             | Amp (-1.36) | - | -              | - | -           |
| <i>IL6ST</i>             | Isth (1.27) | Cvx (-1.31)    | -             | -           | - | -              | - | -           |
| <i>IL7; LOC100622266</i> | -           | ProxUt (-1.31) | DistUt (1.28) | -           | - | -              | - | -           |

|                 |   |                             |               |                |   |   |             |   |
|-----------------|---|-----------------------------|---------------|----------------|---|---|-------------|---|
| <i>IL7R</i>     | - | ProxUt (-1.43)              | -             | -              | - | - | -           | - |
| <i>IL9</i>      | - | -                           | -             | -              | - | - | Inf (1.43)  | - |
| <i>IL9R</i>     | - | -                           | -             | -              | - | - | -           | - |
| <i>ILF2</i>     | - | Amp (-1.37), Inf<br>(-1.85) | -             | Inf (-1.47)    | - | - | Isth (1.26) | - |
| <i>ILF3</i>     | - | -                           | -             | -              | - | - | -           | - |
| <i>IRAK1</i>    | - | -                           | -             | -              | - | - | -           | - |
| <i>IRAK1BP1</i> | - | -                           | DistUt (1.28) | Cvx (-1.83)    | - | - | -           | - |
| <i>IRAK3</i>    | - | -                           | -             | ProxUt (-1.34) | - | - | -           | - |

|                                   |              |                                   |   |             |             |                                |   |                |
|-----------------------------------|--------------|-----------------------------------|---|-------------|-------------|--------------------------------|---|----------------|
| <b>IRAK4</b>                      | -            | DistUt (-1.19),<br>ProxUt (-1.48) | - | UTJ (-1.29) | Inf (1.29)  | -                              | - | -              |
| <b>LOC100516362;</b>              |              |                                   |   |             |             |                                |   |                |
| <b>LOC106509761</b>               | Isth (1.21)  | -                                 | - | -           | Isth (1.15) | -                              | - | -              |
| <b>(IL1R2-like)</b>               |              |                                   |   |             |             |                                |   |                |
| <b>LOC100518910</b>               | -            | -                                 | - | -           | -           | DistUt(-1.26),<br>Isth (-1.45) | - | DistUt (-1.28) |
| <b>(IL17RA-like)</b>              |              |                                   |   |             |             |                                |   |                |
| <b>LOC100622457</b>               | -            | Isth (-2.86)                      | - | UTJ (-4.04) | -           | Isth (-1.7)                    | - | Amp (-2.11)    |
| <b>(IL20R<math>\alpha</math>)</b> |              |                                   |   |             |             |                                |   |                |
| <b>LOC100626904</b>               | UTJ (1.7),   | -                                 | - | -           | -           | -                              | - | -              |
| <b>(IL1R1)</b>                    | Isth (1.94), |                                   |   |             |             |                                |   |                |



|                    |                  |   |   |   |   |   |   |             |                 |
|--------------------|------------------|---|---|---|---|---|---|-------------|-----------------|
|                    | Inf (1.5)        |   |   |   |   |   |   |             |                 |
| LOC100628187; IL22 | -                | - | - | - | - | - | - | -           | -               |
| LOC102162067       | ProxUt (1.32),   |   |   |   |   |   |   |             |                 |
| (IL6Rα-like)       | Amp (1.38),      | - | - | - | - | - | - | -           | -               |
|                    | Inf (1.41)       |   |   |   |   |   |   |             |                 |
|                    | UTJ (1.71),      |   |   |   |   |   |   |             |                 |
|                    |                  |   |   |   |   |   |   | Cvx (-1.8), |                 |
| NFIL3              | Isth (3.61), Amp | - | - | - | - | - | - | -           | ProxUt (-1.34), |
|                    | (2.09),          |   |   |   |   |   |   |             |                 |
|                    |                  |   |   |   |   |   |   |             | Inf (-1.39)     |
|                    | Inf (1.98)       |   |   |   |   |   |   |             |                 |

|                     |                |   |   |   |   |   |                |   |   |
|---------------------|----------------|---|---|---|---|---|----------------|---|---|
| NLRP3               | DistUt (1.34), |   |   |   |   |   |                |   |   |
|                     | UTJ (1.66)     | - | - | - | - | - | UTJ (1.25)     | - |   |
| PPBP; LOC100524561; |                |   |   |   |   |   |                |   |   |
| LOC100620821        |                | - | - | - | - | - | DistUt (-1.19) | - | - |

\* Cvx: cervix; DistUt: distal uterus; ProxUt: proximal uterus; UTJ: utero-tubal junction; Isth: isthmus; Amp: ampulla; and Inf: infundibulum. Natural mating: sows mated with a boar; Semen-AI: sows artificially inseminated with the sperm-peak portion extended to 50 mL with Beltsville thawing solution (BTS); SP-AI: sows cervically infused with the sperm-free seminal plasma (SP) from pooled sperm-peak portion (50 mL); SP-TOTAL: sows cervically infused with the sperm-free SP of the whole ejaculate (50 mL). All treatments were compared with controls.  $p < 0.05$  relative to negative control.

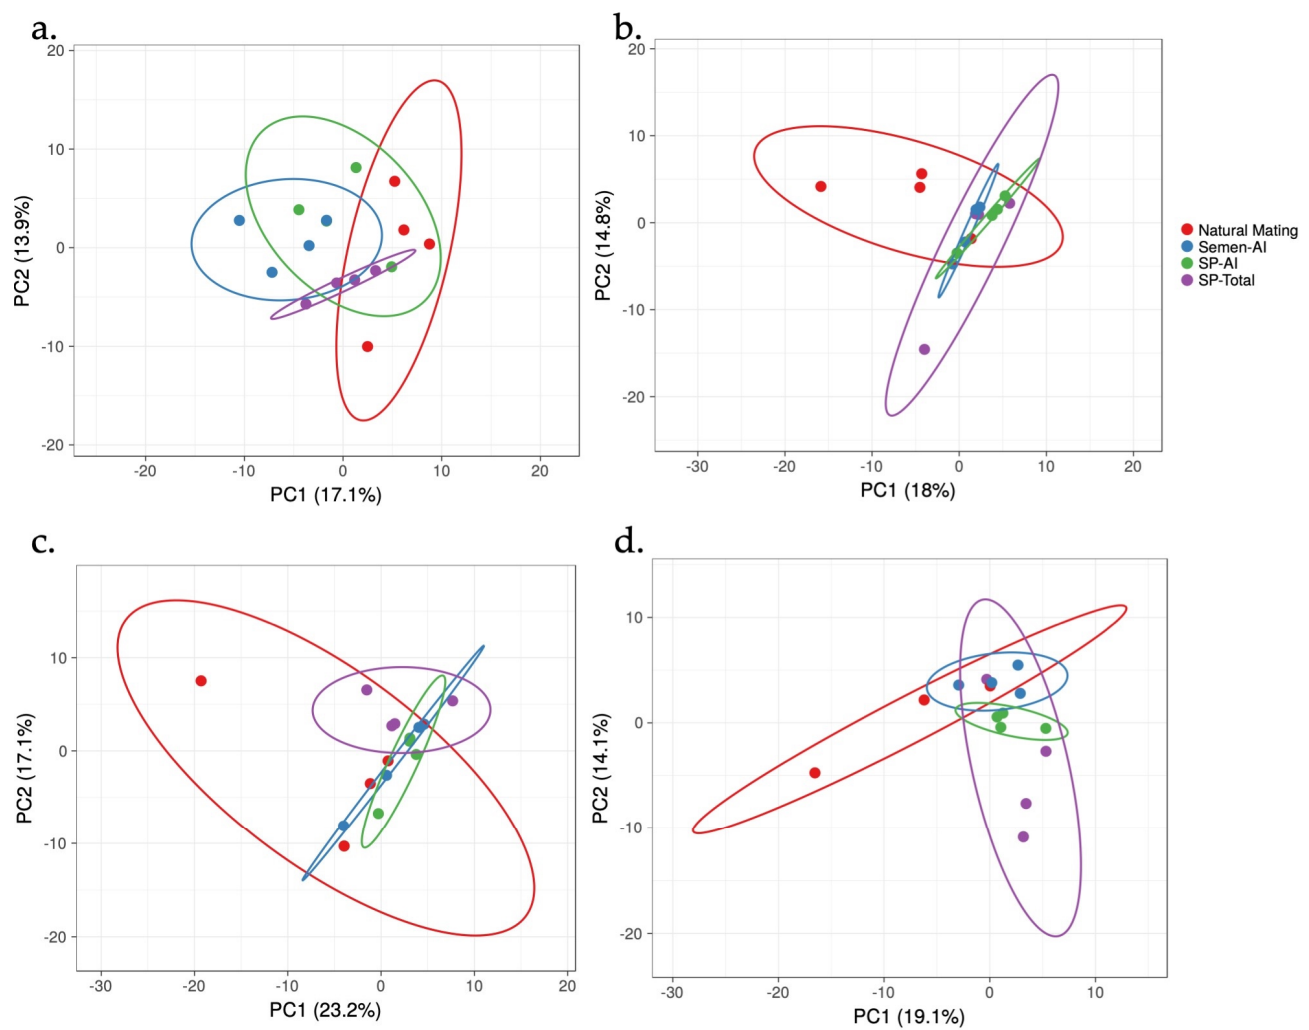

**Figure S1.** Principal Component Analysis of the genes included in this study of natural mating (red); Semen-AI (blue); SP-AI (green); and SP-Total (purple) treatment groups. a. Cvx: cervix; b. Isth: isthmus; c. Amp: ampulla; and d. Inf: infundibulum.

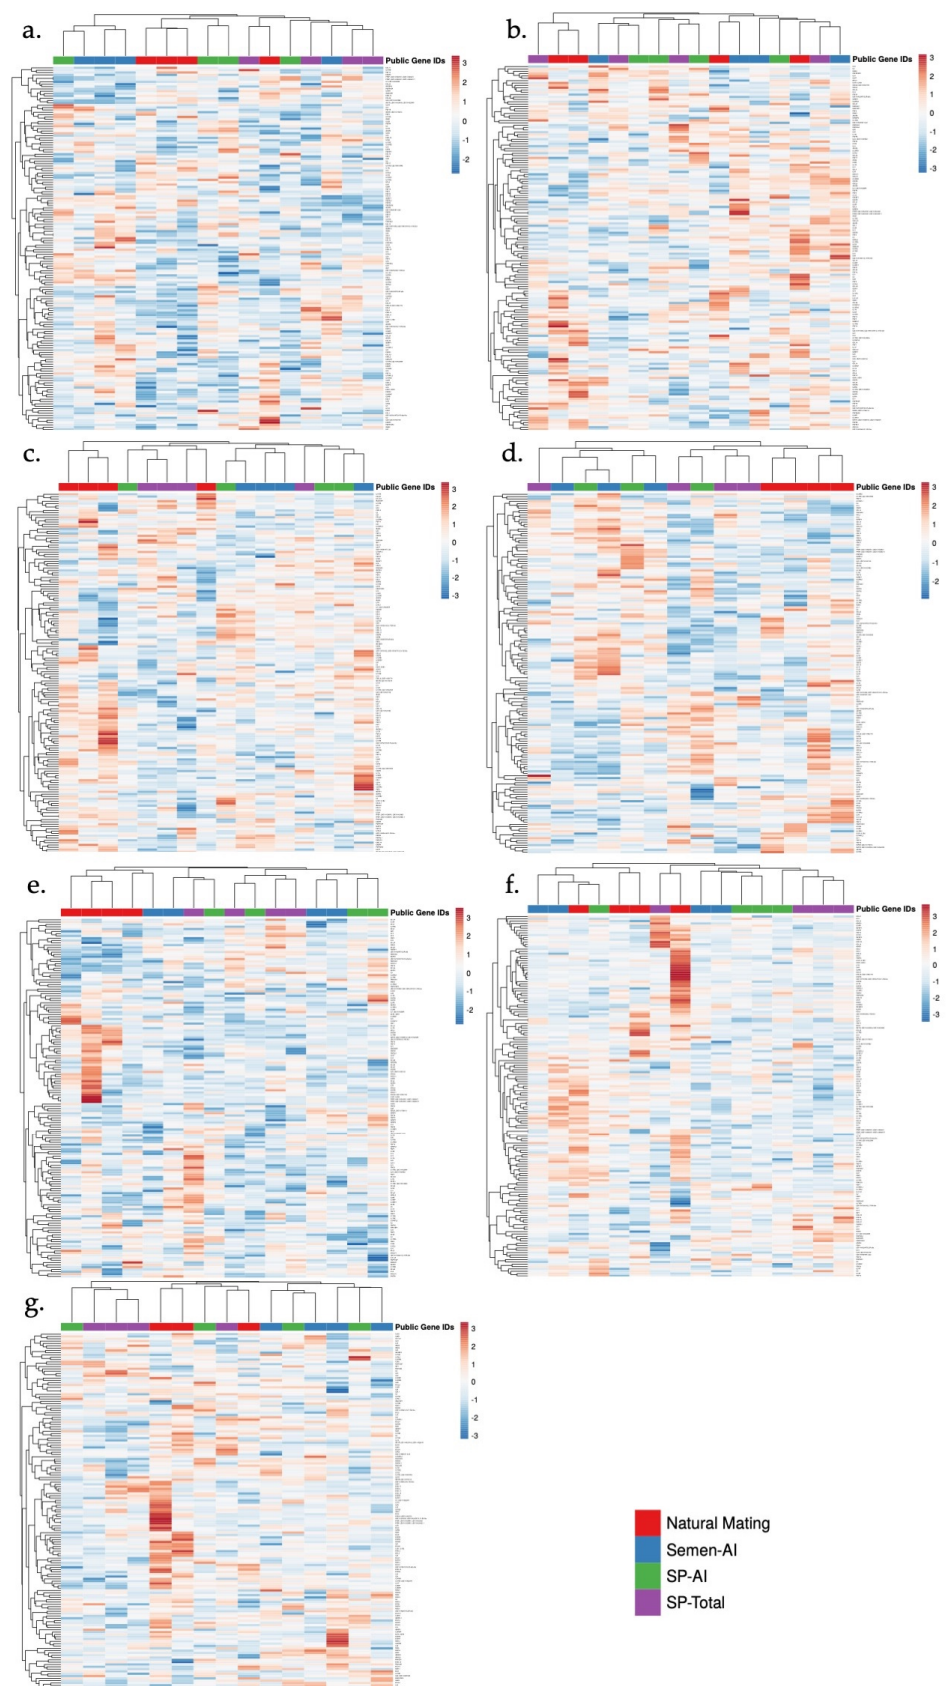

**Figure S2.** Heatmap of the genes included in this study of natural mating (red); Semen-AI (blue); SP-AI (green); and SP-Total (purple) treatment groups. a. Cvx: cervix; b. DistUt: distal uterus; c. ProxUt: proximal uterus; d. UTJ: utero-tubal junction; e. Isth: isthmus; f. Amp: ampulla; and g. Inf: infundibulum.
